CORRECTION

## Correction: Spatio-temporal distribution of Crimean-Congo Hemorrhagic Fever and its relationship with climate factors in Pakistan: A decade-long experience from tertiary care laboratory network

Muhammad Abbas Abid, Joveria Farooqi, Najia Ghanchi, Rabiya Owais, Ayesha Sadiqa, Humaira Shafaq, Erum Khan

The Acknowledgment statement for this article is incorrect. The correct Acknowledgement statement is as follows: Research reported in this publication was supported by the Fogarty International Center of the National Institutes of Health (D43TW012733–02 to EK). The content is solely the responsibility of the authors and does not necessarily represent the official views of the National Institutes of Health.

### Reference

1. Abid MA, Farooqi J, Ghanchi N, Owais R, Sadiqa A, Shafaq H, et al. Spatio-temporal distribution of Crimean-Congo Hemorrhagic Fever and its relationship with climate factors in Pakistan: A decade-long experience from tertiary care laboratory network. PLoS One. 2025;20(5):e0320495. <https://doi.org/10.1371/journal.pone.0320495> PMID: [40354463](https://pubmed.ncbi.nlm.nih.gov/40354463/)

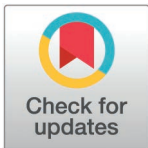

### OPEN ACCESS

**Citation:** Abid MA, Farooqi J, Ghanchi N, Owais R, Sadiqa A, Shafaq H, et al. (2026) Correction: Spatio-temporal distribution of Crimean-Congo Hemorrhagic Fever and its relationship with climate factors in Pakistan: A decade-long experience from tertiary care laboratory network. PLoS One 21(1): e0341256. <https://doi.org/10.1371/journal.pone.0341256>

**Published:** January 20, 2026

**Copyright:** © 2026 Abid et al. This is an open access article distributed under the terms of the [Creative Commons Attribution License](https://creativecommons.org/licenses/by/4.0/), which permits unrestricted use, distribution, and reproduction in any medium, provided the original author and source are credited.
